# Supplementary material
Source: publisher figshare collection journal article supplement (https://acs.figshare.com/ndownloader/files/13993610)
Supplement: Supplementary file 1 [file 13993610]

Supporting Information for:

**Tobacco Mosaic Virus-Functionalized  
Mesoporous Silica Nanoparticles, a Wool  
Ball-like Nanostructure for Drug Delivery**

Laura Marín-Caba<sup>1</sup>, Paul L. Chariou<sup>2,3</sup>, Carmen Pesquera<sup>4</sup>, Miguel A. Correa-Duarte<sup>1</sup>  
and Nicole F. Steinmetz<sup>2,3,5,6</sup>.

<sup>1</sup>Department of Physical Chemistry, Biomedical Research Center (CINBIO), Southern Galicia Institute of Health Research (IISGS), and Biomedical Research Networking Center for Mental Health (CIBERSAM),  
Universidade de Vigo, 36310 Vigo, Spain.

<sup>2</sup>Department of Biomedical Engineering, Case Western Reserve University Schools of Medicine and  
Engineering, Cleveland OH 44106, USA.

<sup>3</sup>Department of Bioengineering, <sup>5</sup>NanoEngineering, <sup>6</sup>Radiology, <sup>7</sup>Moore's Cancer Center, University of  
California-San Diego, La Jolla CA 92039, USA.

<sup>4</sup>Department of Chemistry and Processes and Resources Engineering, Superior Technical School of  
Industrial and Telecommunications, University of Cantabria (UC), Sanitary Research Institute, (IDIVAL,  
Valdecilla), Cantabria, Spain

Co-corresponding authors: [nsteinmetz@ucsd.edu](mailto:nsteinmetz@ucsd.edu) and [macorrea@uvigo.es](mailto:macorrea@uvigo.es)

## **List of Contents**

Figure S1. (a) UV/Vis spectra of different particles. (b) ZP of the different particles. ...S3

Figure S2. Cumulative release from both RBITC and CY5 from the different particlesS4

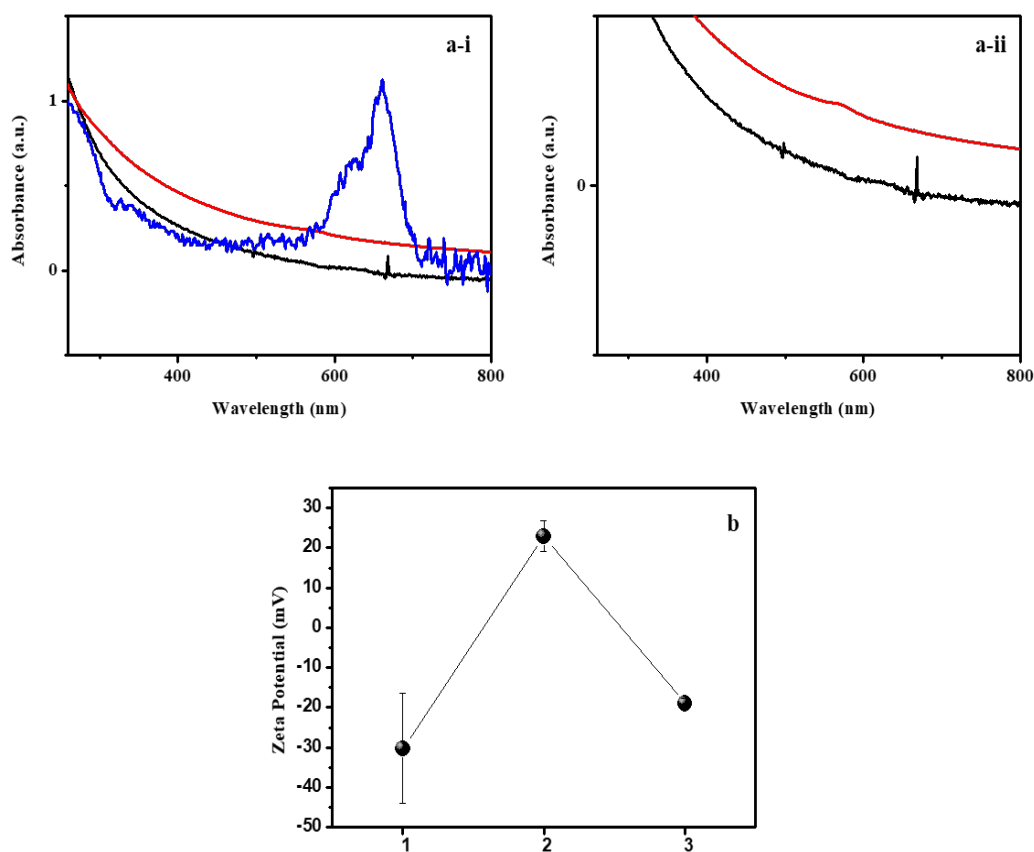

**Figure S1.** (a-i) UV/Vis spectra of bare MSNP (black line), RBITC-MSNP (red line) and MSNP@TMV (blue line). (a-ii) UV-Vis spectra inlet of bare MSNP (black line), RBITC-MSNP (red line), showing a slight shoulder at 554 nm from RBITC (a strong peak is not observed due to the scattering of the MSNPs resulting in the shifted baseline). (b) Zeta potential of (1) bare MSNP; (2) MSNP-PDADMAC; (3) MSNP@TMV. Standard deviation is shown from 3 measurements.

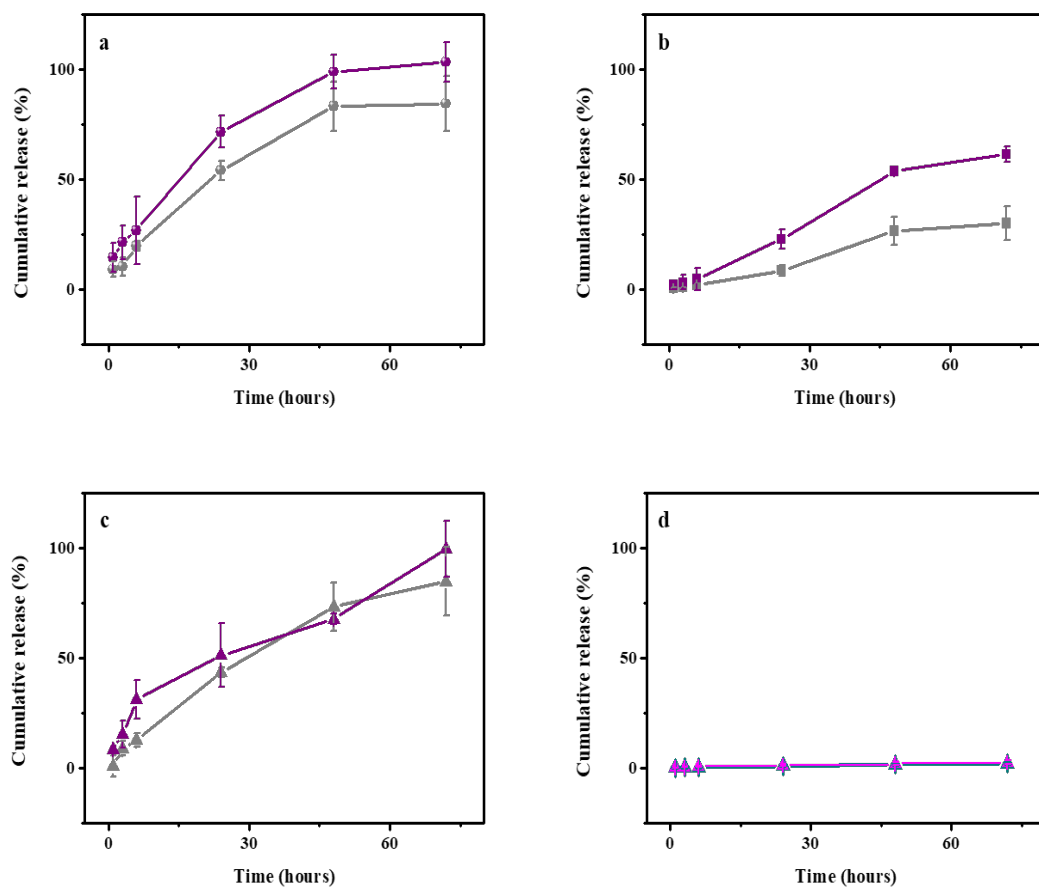

**Figure S2.** Cumulative release of RBITC (loaded into the MSNP) from: (a) RBITC-MSNP; (b) RBITC-MSNP-APTS; and (c) MSNP@TMV under physiological conditions at pH 7.4 (purple), and under lysosomal or tumoral conditions at pH 5.0 (gray). (d) Cumulative release of Cy5 (covalently attached to TMV) from MSNP@TMV at pH 7.4 and pH 5.0 is in cyan and pink, respectively. Standard deviation of three replicates is shown for each sample.
